# Supplementary material for: Effect of Silymarin and Quercetin in a Miniaturized Scaffold in Wistar Rats against Non-alcoholic Fatty Liver Disease
Source: PubMed Central journal article supplement — ACS Omega. 2021 Aug 3;6(32):20735–45. doi: 10.1021/acsomega.1c00555 (PMC8374897; doi:10.1021/acsomega.1c00555), 2021-08-03
Supplement: ao1c00555_si_001.pdf [file ao1c00555_si_001.pdf]

## Supplementary Information

**Effect of silymarin and quercetin in miniaturized scaffold in Wistar rats against non-alcoholic fatty liver disease**

**Jaisheela Marry Stephen Robert<sup>1,3</sup>, Muthukumar Serva Peddha<sup>2,3</sup> and Alok Kumar Srivastava<sup>1,3\*</sup>**

<sup>1</sup>Department of Food Safety and Analytical Quality Control Laboratory, CSIR-Central Food Technological Research Institute, Mysuru 570 020, Karnataka, India.

<sup>2</sup>Department of Biochemistry, CSIR- Central Food Technological Research Institute, Mysuru 570 020, Karnataka, India.

<sup>3</sup>Academy of Scientific and Innovative Research (AcSIR), Ghaziabad, 201002, India.

\*Corresponding author:

Alok Kumar Srivastava,

Chief Scientist,

Department of Food Safety and Analytical Quality Control Laboratory,

CSIR- Central Food Technological Research Institute,

Mysuru 570 020, Karnataka, India.

Phone: 91-821-2514972

Fax: 91-821-2517233

Email: [aksrivastava@cftri.res.in](mailto:aksrivastava@cftri.res.in)

**Table S1.** The miniaturised scaffold efficiency of quercetin and silymarin with different biopolymers.

| Sample name | Quercetin Recovery (%)  | Amount of silymarin constituents (mg/g) |                        |                        |                        |                        |                         |
|-------------|-------------------------|-----------------------------------------|------------------------|------------------------|------------------------|------------------------|-------------------------|
|             |                         | Silybin A                               | Silybin B              | Isosilybin A           | Isosilybin B           | silychristin           | silydianin              |
| SQBC        | 98.84±0.57 <sup>a</sup> | 2.27±0.01 <sup>a</sup>                  | 9.15±0.62 <sup>a</sup> | 9.90±0.53 <sup>a</sup> | 4.99±0.23 <sup>a</sup> | 4.67±0.21 <sup>a</sup> | 7.50±0.67 <sup>a</sup>  |
| SQMD        | 97.78±0.42 <sup>b</sup> | 2.15±0.01 <sup>b</sup>                  | 6.83±0.73 <sup>c</sup> | 8.16±0.61 <sup>b</sup> | 3.51±0.17 <sup>b</sup> | 4.31±0.41 <sup>a</sup> | 3.475±0.82 <sup>c</sup> |
| SQC         | 96.97±0.58 <sup>c</sup> | 2.18±0.01 <sup>b</sup>                  | 7.62±0.80 <sup>b</sup> | 7.90±0.42 <sup>b</sup> | 2.71±0.52 <sup>c</sup> | 3.36±0.62 <sup>b</sup> | 5.96±0.53 <sup>b</sup>  |
| SQP         | 97.20±0.48 <sup>b</sup> | 1.91±0.15 <sup>b</sup>                  | 8.31±0.56 <sup>b</sup> | 8.53±0.31 <sup>b</sup> | 3.18±0.34 <sup>b</sup> | 3.28±0.45 <sup>b</sup> | 2.47±0.28 <sup>c</sup>  |
| SQWP        | 96.20±0.66 <sup>c</sup> | 1.75±0.12 <sup>b</sup>                  | 6.57±0.59 <sup>c</sup> | 6.30±0.45 <sup>c</sup> | 2.84±0.08 <sup>b</sup> | 3.49±0.52 <sup>b</sup> | 4.66±0.30 <sup>b</sup>  |
| SQGA        | 96.17±0.70 <sup>c</sup> | 1.80±0.12 <sup>b</sup>                  | 7.42±0.74 <sup>b</sup> | 7.97±0.64 <sup>b</sup> | 4.01±0.35 <sup>a</sup> | 3.60±0.38 <sup>b</sup> | 6.89±0.43 <sup>a</sup>  |

**SQBC** = Silymarin and quercetin with  $\beta$ -cyclodextrin, **SQMD** = Silymarin and quercetin with maltodextrin, **SQC** = Silymarin and quercetin with cellulose, **SQP** = Silymarin and quercetin with pectin, **SQWP** = Silymarin and quercetin with whey protein and **SQGA** = Silymarin and quercetin with gum arabic. Results are expressed as mean  $\pm$ SEM of the measurements (n = 6 animal/group). Different subscripts following mean values within a row indicate significantly different groups in Duncan's multiple comparison test with p < 0.05.

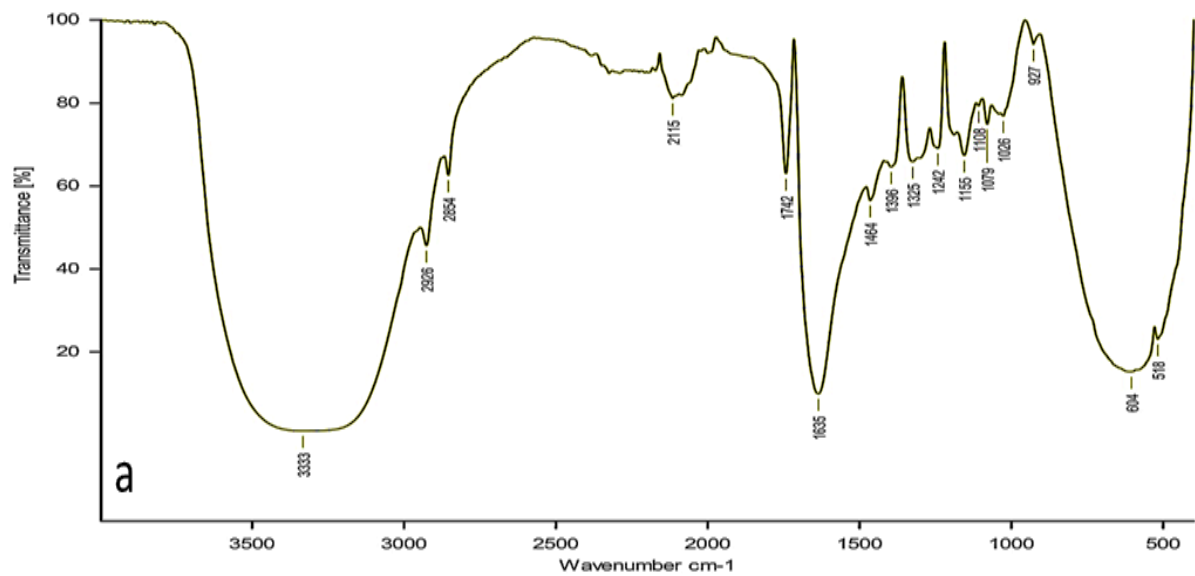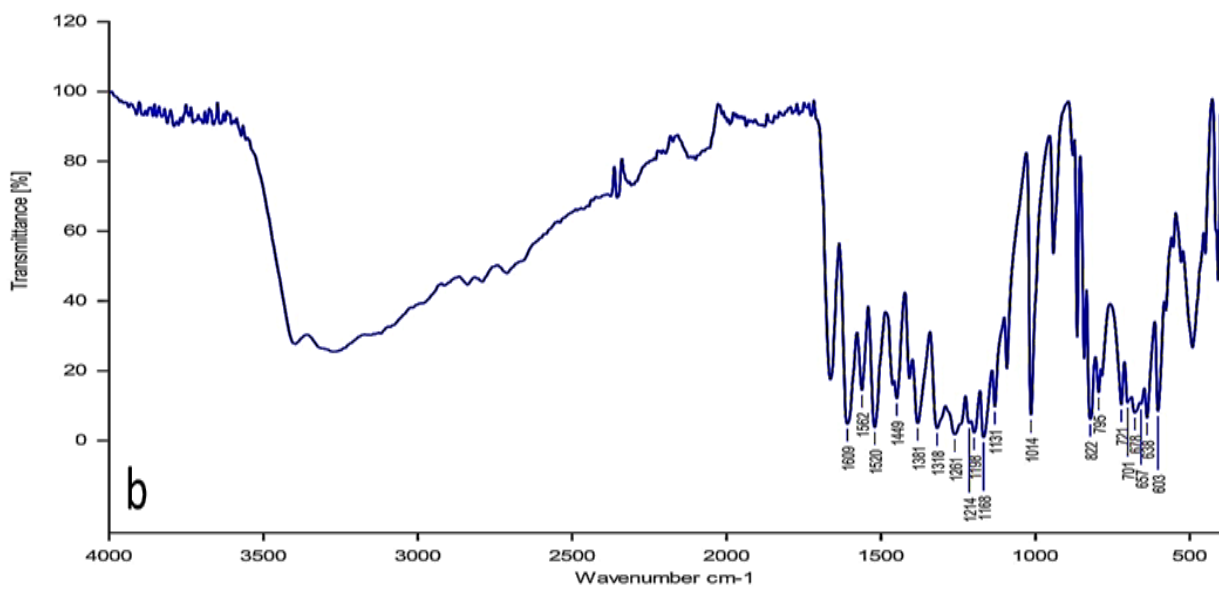

**Figure S1.** FTIR spectra of (a) Silymarin (b) Quercetin
